# Supplementary material for: Unannotated microprotein EMBOW regulates the interactome and chromatin and mitotic functions of WDR5
Source: PubMed Central journal article supplement — Cell Rep. Author manuscript; Available in PMC 2023 Nov 7. (PMC10629662; doi:10.1016/j.celrep.2023.113145), 2023-09-19
Supplement: NIHMS1933924-supplement-1.pdf [file NIHMS1933924-supplement-1.pdf]

**Cell Reports, Volume 42**

**Supplemental information**

**Unannotated microprotein EMBOW**

**regulates the interactome and chromatin**

**and mitotic functions of WDR5**

**Yanran Chen, Haomiao Su, Jianing Zhao, Zhenkun Na, Kevin Jiang, Antonella Bacchiocchi, Ken H. Loh, Ruth Halaban, Zhentian Wang, Xiongwen Cao, and Sarah A. Slavoff**

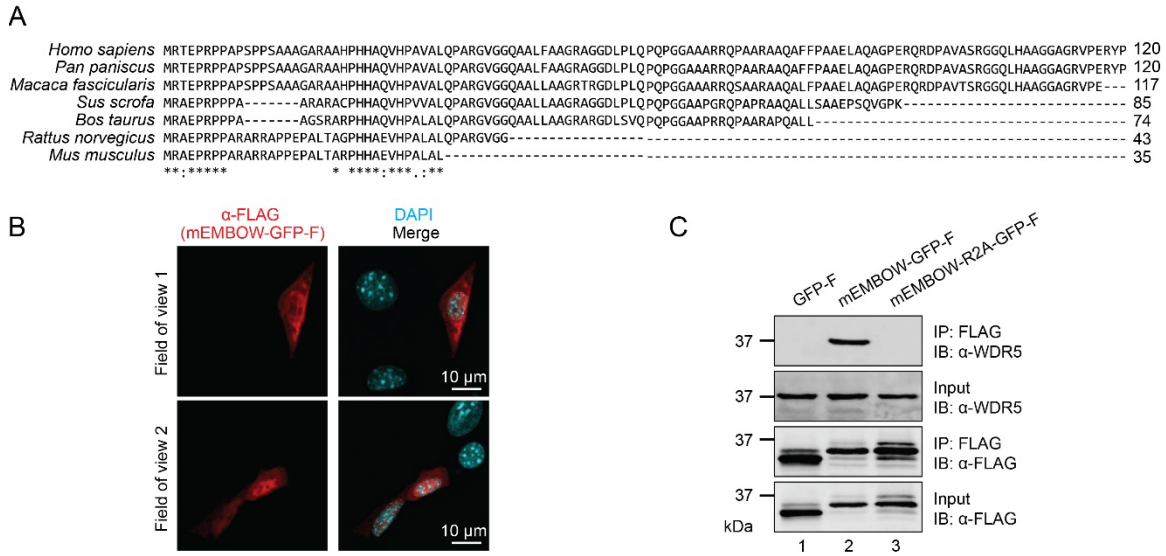

**Figure S1. EMBOW is conserved in mice. Related to Figure 1 and 2.**

(A) *SCRIB* mRNAs from *Homo sapiens* (NM\_182706.5), *Pan paniscus* (XM\_034966823.1), *Macaca fascicularis* (XM\_005564272.2), *Sus scrofa* (XM\_021090546.1), *Bos taurus* (XM\_025001931.1), *Rattus norvegicus* (NM\_001191879) and *Mus musculus* (NM\_134089.2) were obtained from the NCBI nucleotide database and translated in the +1, +2 and +3 frames using the ExPasy translate tool to identify upstream ORFs. The full-length sequences of hypothetical EMBOW homologs were predicted in each transcript and aligned with ClustalW2.

(B) 3T3 cells transfected with a C-terminal GFP-FLAG dual tagged mouse EMBOW (mEMBOW-GFP-F) expression construct were immunostained with anti-FLAG (red) and DAPI (cyan); scale bar, 10  $\mu$ m. Data are representative of three biological replicates.

(C) HEK 293T cells were transfected with GFP-FLAG (GFP-F, lane 1), wild-type (mEMBOW-GFP-F, lane 2) or R2A mutated (mEMBOW-R2A-GFP-F, lane 3) mEMBOW-GFP-FLAG, and FLAG IP was performed, followed by IB. Data are representative of three biological replicates.

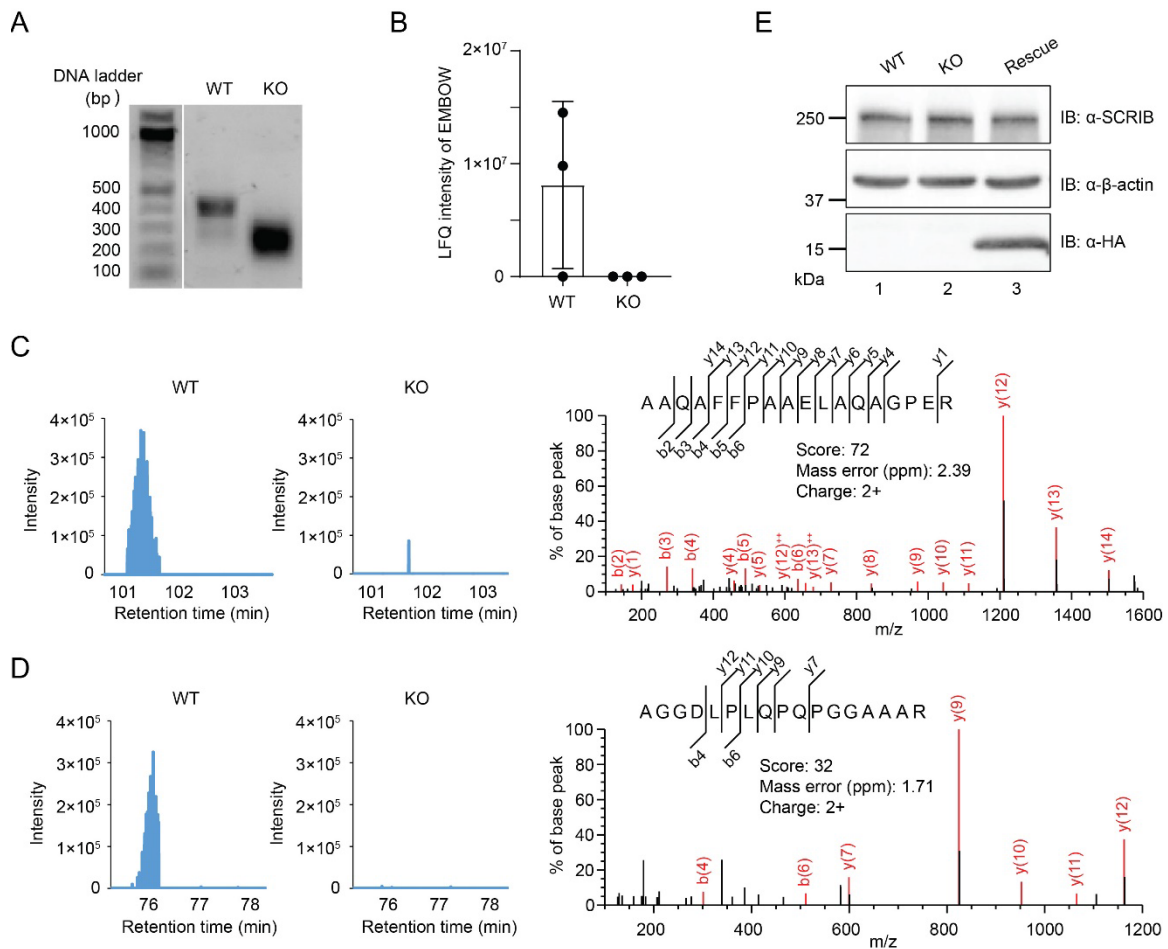

**Figure S2. Validation of the EMBOW knock-out HEK 293T cell line. Related to Figure 3.**

(A) Genomic DNA PCR and agarose gel electrophoresis of wild-type (WT) or EMBOW KO (KO) HEK 293T cells.

(B) Label-free quantitation (LFQ,  $N = 3$  biologically independent experiments) of endogenous EMBOW co-purifying with WDR5-FLAG in an anti-FLAG co-IP from wild-type (WT) or EMBOW KO (KO) HEK 293T cells stably expressing WDR5-FLAG. Data represent mean values  $\pm$  s.e.m..

(C-D) Shown are MS1 extracted ion chromatograms (EICs, left) corresponding to MS/MS spectra (right) of two EMBOW tryptic peptides detected in WT HEK 293T cells. EIC analysis for each EMBOW peptide was performed in both WT and EMBOW KO HEK 293T cells.

(E) Western blot analysis of SCRIB expression in wild-type (WT), EMBOW knock-out (KO) and rescue (KO stably expressing EMBOW-FLAG-HA) HEK 293T cells with the indicated antibodies. Data are representative of three biological replicates.

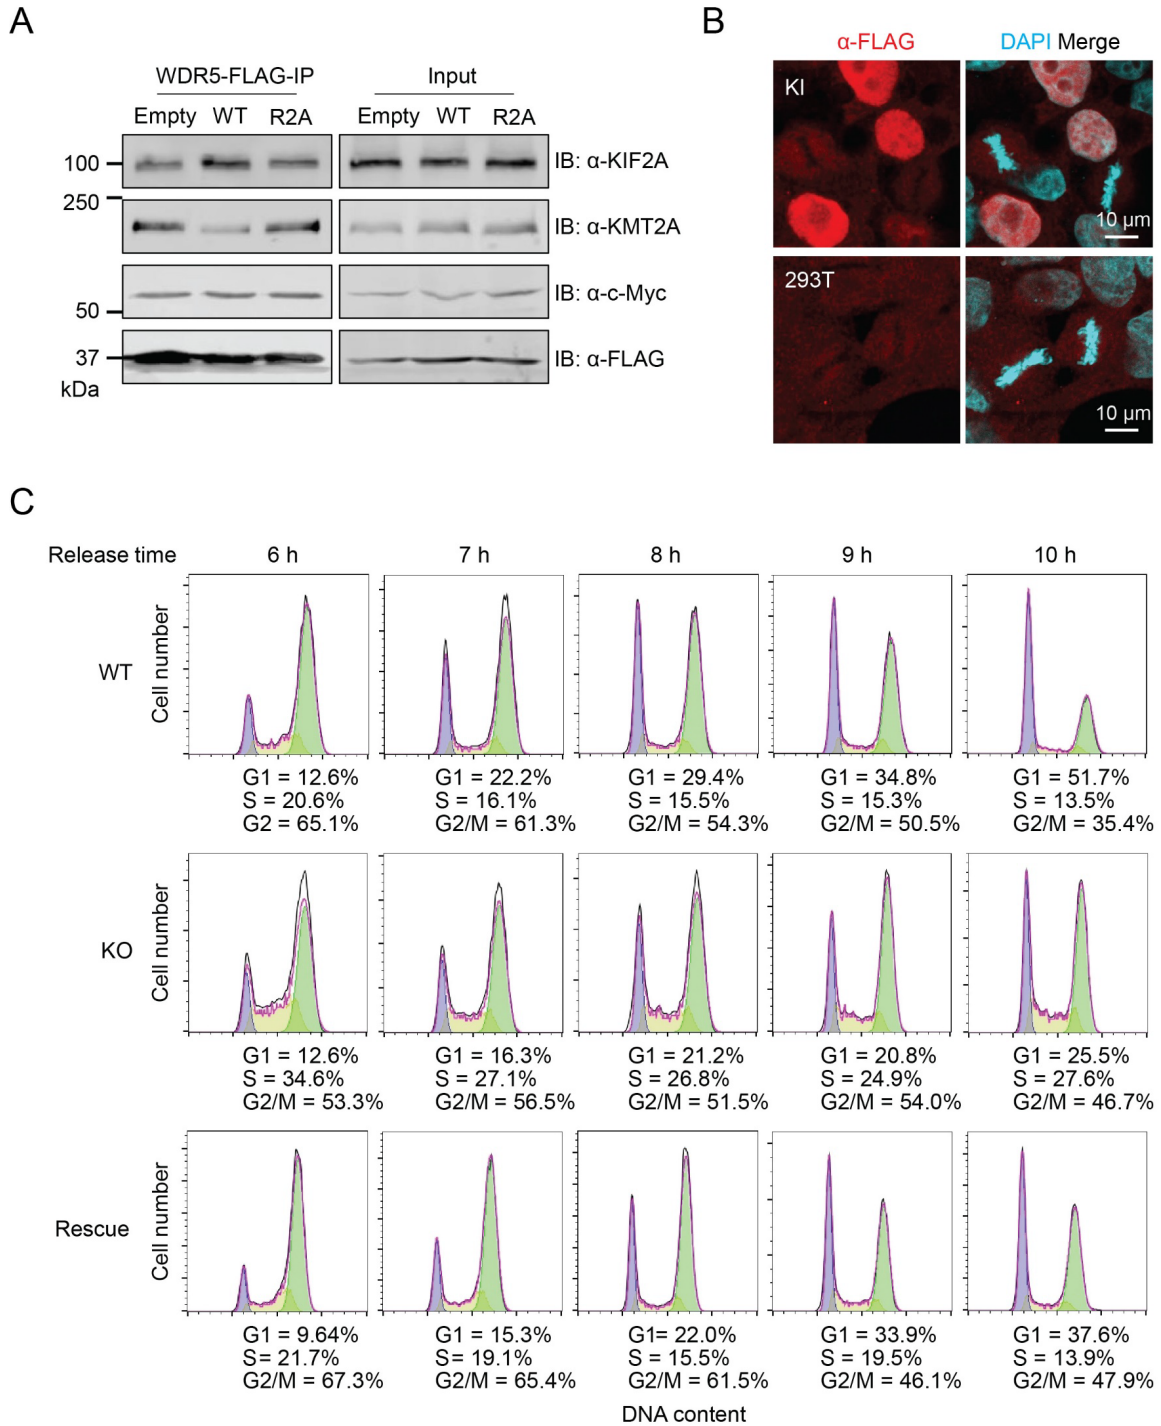

**Figure S3. EMBOW does not regulate the interaction between WDR5 and MYC, and loss of EMBOW prolongs G2/M phase. Related to Figures 3 and 4.**

(A) HEK 293T cells stably expressing WDR5-FLAG were transfected with pcDNA 3.1 empty vector (Empty), wild-type (WT) or R2A mutated (R2A) EMBOW-myc, followed with WDR5-FLAG IP and immunoblotting with antibodies indicated on the right. Cell

lysates (4%) before IP (input) were used as loading controls. Data are representative of two biological replicates.

(B) Immunostaining of EMBOW-FLAG-HA KI cells (KI) and HEK 293T cells (293T) as a control with anti-FLAG (red) and DAPI (cyan). Scale bar, 10  $\mu\text{m}$ . Data are representative of three biological replicates.

(C) Flow cytometry analysis of synchronized wild-type (WT, top panel), EMBOW knock-out (KO, middle panel) and rescue (KO stably expressing EMBOW-FLAG-HA, bottom panel) HEK 293T cells released from the G1/S boundary. Shown are cells released from 6-hour to 10-hour time point. The time points after release are indicated at the top, and the cell cycle distributions are quantified below. Data are representative of three biological replicates.

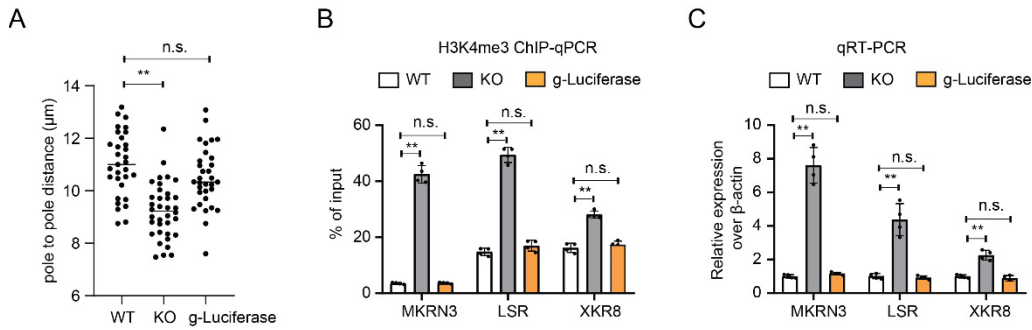

**Figure S4. Loss of EMBOW regulates spindle formation and off-target genes independent of Cas9 expression. Related to Figures 4 and 6.**

(A) Quantitation of the pole-to-pole distances of parental HEK 293T (WT), EMBOW KO (KO), or HEK 293T transiently transfected with gRNA plasmid targeting luciferase (g-luciferase) via KIF2A immunostaining, totaling > 30 cells for each measurement. Data represent mean values  $\pm$  s.e.m., and significance was evaluated by one-way ANOVA (Dunnett's test). \*\*  $p < 0.01$ , n.s., not significant.

(B-C) H3K4me3 ChIP-qPCR (B) or quantitative RT-PCR (qRT-PCR, C) results of three *de novo* target genes in the three cell lines described above. Data represent mean values  $\pm$  s.e.m.;  $N = 4$  biologically independent samples. Significance was evaluated with one-way ANOVA (Dunnett's test). \*\*  $p < 0.01$ , n.s., not significant.

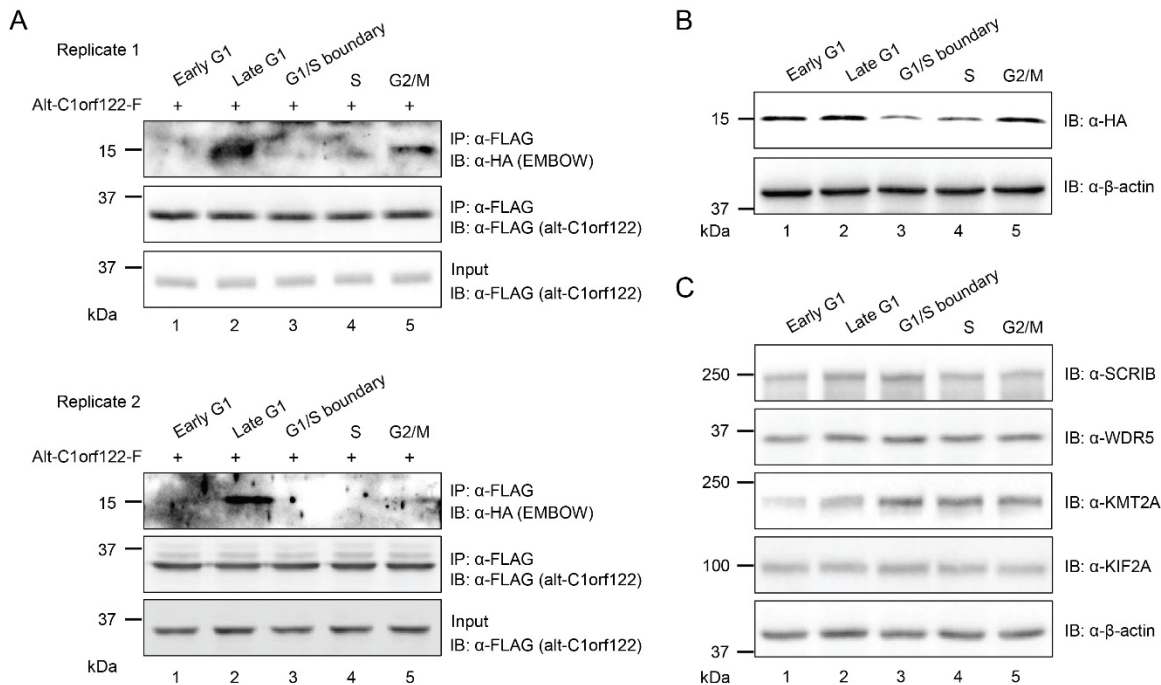

**Figure S5. EMBOW is cell-cycle regulated. Related to Figures 4-6.**

(A) EMBOW-FLAG-HA knock-in (KI) HEK 293T cells were transiently transfected with a plasmid encoding alt-C1orf122-FLAG, serving as a FLAG immunoprecipitation (IP) positive control, and cells were synchronized and released from G2/M phase (lanes 1 and 2, release time point 3 h and 8 h, respectively), or G1/S boundary (lanes 3-5, release time point 0 h, 3 h and 7 h, respectively), followed by FLAG IP and immunoblotting (IB). Cell lysates (4%) before IP (input) were used as the loading controls. Shown are two biological replicates.

(B) Synchronized HEK 293T cells stably expressing EMBOW-FLAG-HA were released from G2/M phase (lanes 1 and 2, release time point 3 h and 8 h, respectively), or G1/S boundary (lanes 3-5, release time point 0 h, 3 h and 7 h, respectively), followed by immunoblotting with antibodies indicated on the right. Data are representative of three biological replicates.

(C) HEK 293T cells were released from G2/M phase (lanes 1 and 2, release time point 3 h and 8 h, respectively), or G1/S boundary (lanes 3-5, release time point 0 h, 3 h and 7 h, respectively), followed by immunoblotting with antibodies indicated on the right. Data are representative of three biological replicates.



| Rank | Log <sub>2</sub><br>(LFQ<br>intensity<br>EMBOW-<br>FH/293T) | - Log <sub>10</sub><br>( <i>p</i> -<br>value) | Gene<br>name | Description                                                                             |
|------|-------------------------------------------------------------|-----------------------------------------------|--------------|-----------------------------------------------------------------------------------------|
| 1    | 31.61                                                       | 6.40                                          | EMBOW        | Unannotated microprotein EMBOW                                                          |
| 2    | 27.06                                                       | 6.20                                          | WDR5         | WD repeat-containing protein 5                                                          |
| 3    | 24.48                                                       | 6.09                                          | SNRPD3       | Small nuclear ribonucleoprotein Sm D3                                                   |
| 4    | 23.99                                                       | 5.87                                          | RPL13        | 60S ribosomal protein L13                                                               |
| 5    | 23.82                                                       | 5.83                                          | BOLA2        | BolA-like protein 2. Acts as a cytosolic iron-sulfur (Fe-S) cluster assembly factor.    |
| 6    | 23.80                                                       | 6.02                                          | RBM8A        | RNA-binding protein 8A                                                                  |
| 7    | 23.23                                                       | 5.88                                          | RPS23        | 40S ribosomal protein S23                                                               |
| 8    | 22.88                                                       | 5.89                                          | LIMA1        | LIM domain and actin-binding protein 1                                                  |
| 9    | 22.81                                                       | 5.94                                          | JUP          | Junction plakoglobin. Common junctional plaque protein.                                 |
| 10   | 22.76                                                       | 5.94                                          | DSC1         | Desmocollin-1, component of intercellular desmosome junctions.                          |
| 11   | 22.24                                                       | 5.94                                          | CAMSAP3      | Calmodulin-regulated spectrin-associated protein 3, key microtubule-organizing protein. |

**Table S1 | List of proteins enriched by EMBOW co-immunoprecipitation. Related to Figure 2.**

Shown are top 10 proteins enriched by EMBOW identified by quantitative LC-MS/MS analysis with  $-\text{Log}_{10}(p\text{-value}) > 1.0$  (two sample *t*-test evaluated with Perseus).

| Gene name | Log <sub>2</sub> (LFQ intensity OE/Empty) | - Log <sub>10</sub> (p-value) |
|-----------|-------------------------------------------|-------------------------------|
| CXXC1     | -0.2676                                   | 1.45264                       |
| KMT2A     | -0.2118                                   | 1.0525                        |
| RBBP5     | -0.1885                                   | 0.88717                       |
| KMT2B     | -0.1755                                   | 0.571822                      |
| KMT2C     | -0.0728                                   | 0.361724                      |
| KMT2D     | -0.03627                                  | 0.130469                      |
| DPY30     | 0.195867                                  | 0.318485                      |

**Table S2 | Enriched fold-changes and significance of other KMT2 or WRAD complex members upon EMBOW overexpression. Related to Figure 3.** Significance was evaluated with Perseus (two sample *t*-test). Statistically significant changes were defined as  $-\log_{10} (p \text{ value}) \geq 1$ .

| <b>qPCR primers (5' - 3')</b> |           |                      |                         |
|-------------------------------|-----------|----------------------|-------------------------|
| Target genes                  | Use       | Forward primer       | Reverse primer          |
| RPL5                          | ChIP-qPCR | CCTTTTCCCACCCCTAGC   | CCATGCATCTAAAGCCCCGA    |
| RPL35                         | ChIP-qPCR | CTGCCATCGACTACGAGTG  | CTGGGTTACTCTGCCCAAGG    |
| RPS24                         | ChIP-qPCR | TGAGCTATAGGCACGCGAAG | CCCTCGACAACCATCCTCTG    |
| MKRN3                         | ChIP-qPCR | GCGCTTCTAACACAGTGGGA | TCACCAGCAAGGCATTAGCA    |
| LSR                           | ChIP-qPCR | CGTCTTCGTGTGGCTTCTGC | ACTCCATCCATCCCCCTCTAC   |
| XKR8                          | ChIP-qPCR | AATGTGCCTTTGCGTTTCGT | TTTTACCTTTGAGGCGCCCG    |
| RPL5                          | qRT-PCR   | GCCTTGCCAGAACTACCACT | TTCTGGCCCATGATGTGCTT    |
| RPL35                         | qRT-PCR   | CGAGTCGTCCGAAATCCAT  | CAGGTTCTCCTCGTGCTTGT    |
| RPS24                         | qRT-PCR   | ATGAGGGAATTGGGGCTTGG | TTCTACCTGCCACACAACCC    |
| MKRN3                         | qRT-PCR   | CAGCGTGGTATGGACAAGGT | TCCACCTGCGGATACACCTA    |
| LSR                           | qRT-PCR   | TCACCGGAAATGCTGACCTG | GAAGAGCCAGTCAAGGACGAT   |
| XKR8                          | qRT-PCR   | AGGAGGAGCCCTCTGAGTTT | GATGCCAACCCACTGGTAGT    |
| SCRIB                         | qRT-PCR   | TGCCCTTGCTGGAAAGAAGT | TCAGCAAAGTCCGGTGACTG    |
| $\beta$ -actin                | qRT-PCR   | AGGCACCAGGGCGTGAT    | GCCCACATAGGAATCCTTCTGAC |

**Table S3 | qPCR primers (5' - 3'). Related to Figures 5 and 6.**
